# Supplementary material for: Solution-processed 2D materials on paper substrates for photodetection and photomechanical applications
Source: Royal Society of Chemistry journal article supplement (doi:10.1039/d2tc02742a), 2022-01-01
Supplement: d2tc02742a5.pdf [file d2tc02742a5.pdf]

Supporting Information

## Solution-processed 2D materials on paper substrates for photodetection and photomechanical applications

Kenneth Lobo<sup>1,3</sup>, Rohit Thakur<sup>1</sup>, Subbarao Krishna Prasad<sup>2</sup> and H. S. S. Ramakrishna Matte<sup>1\*</sup>

<sup>1</sup>Energy Materials Laboratory, Centre for Nano and Soft Matter Sciences, Arkavathi campus, Survey No.7, Shivanapura, Dasanapura Hobli, Bengaluru – 562162, India

<sup>2</sup>Centre for Nano and Soft Matter Sciences, Arkavathi campus, Survey No.7, Shivanapura, Dasanapura Hobli, Bengaluru – 562162, India

<sup>3</sup>Manipal Academy of Higher Education, Manipal – 576 104, India

\*corresponding email: [matte@cens.res.in](mailto:matte@cens.res.in), [krishnamatte@gmail.com](mailto:krishnamatte@gmail.com)

---

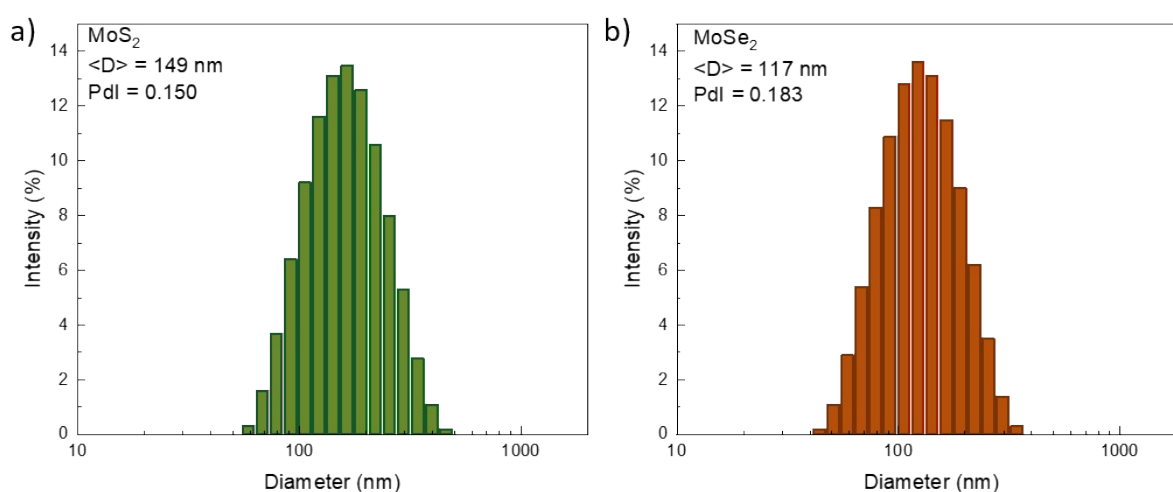

Figure S1. Nanosheet size determination for (a) MoS<sub>2</sub> and (b) MoSe<sub>2</sub> using dynamic light scattering.

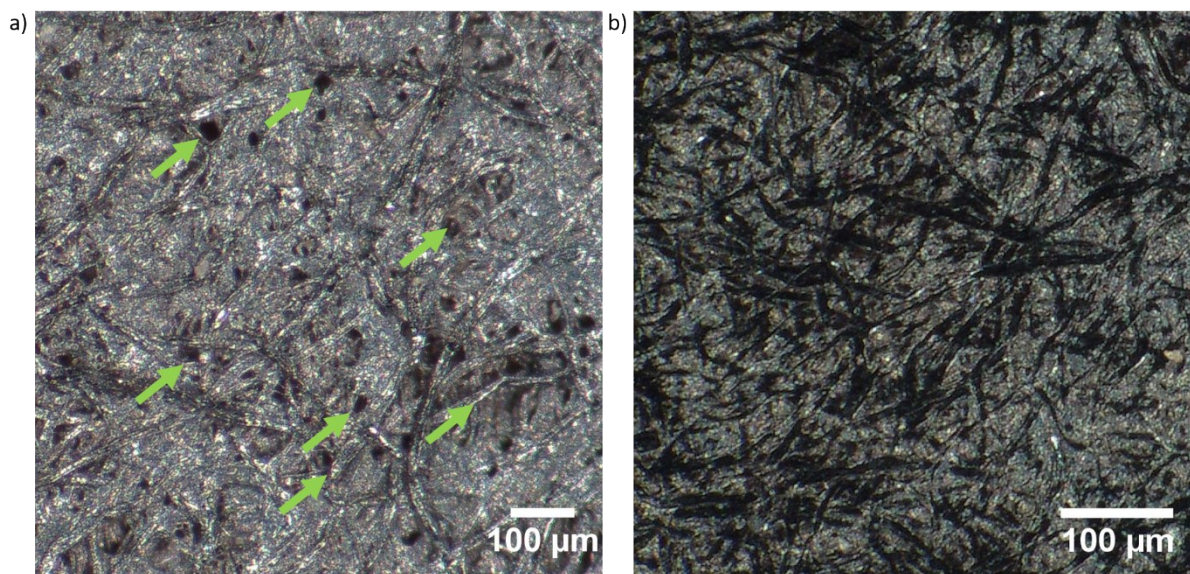

Figure S2. Optical micrograph of the 2D material coated papers (a) before and (b) after calendaring. Voids are highlighted in (a) with arrows.

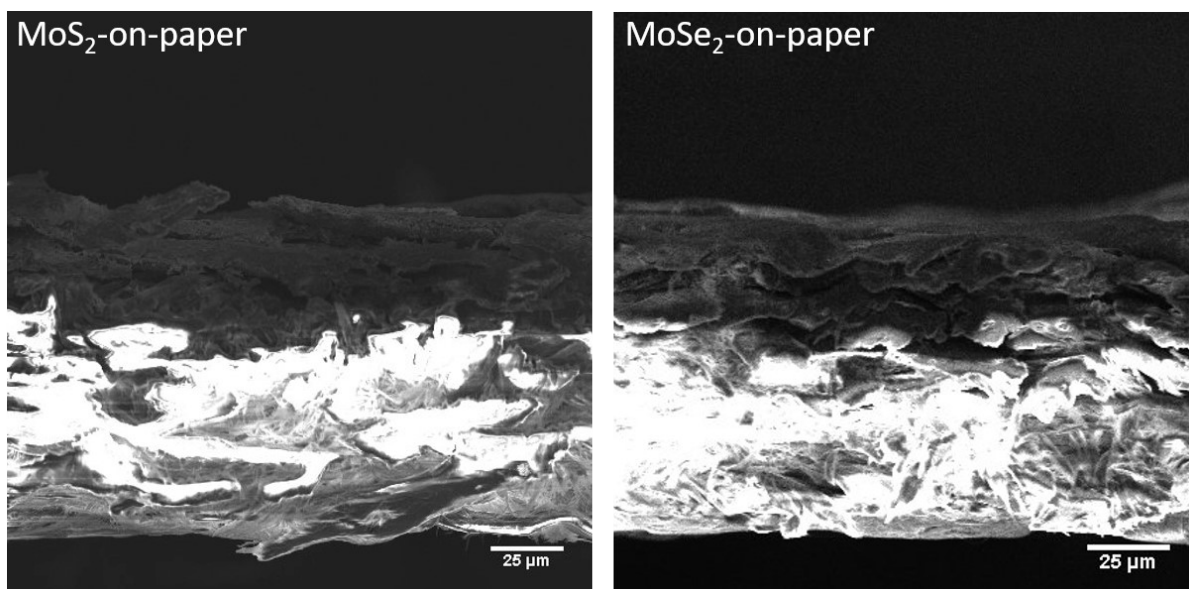

Figure S3. Cross-sectional FESEM images of MoS<sub>2</sub> and MoSe<sub>2</sub> coated paper after calendaring.

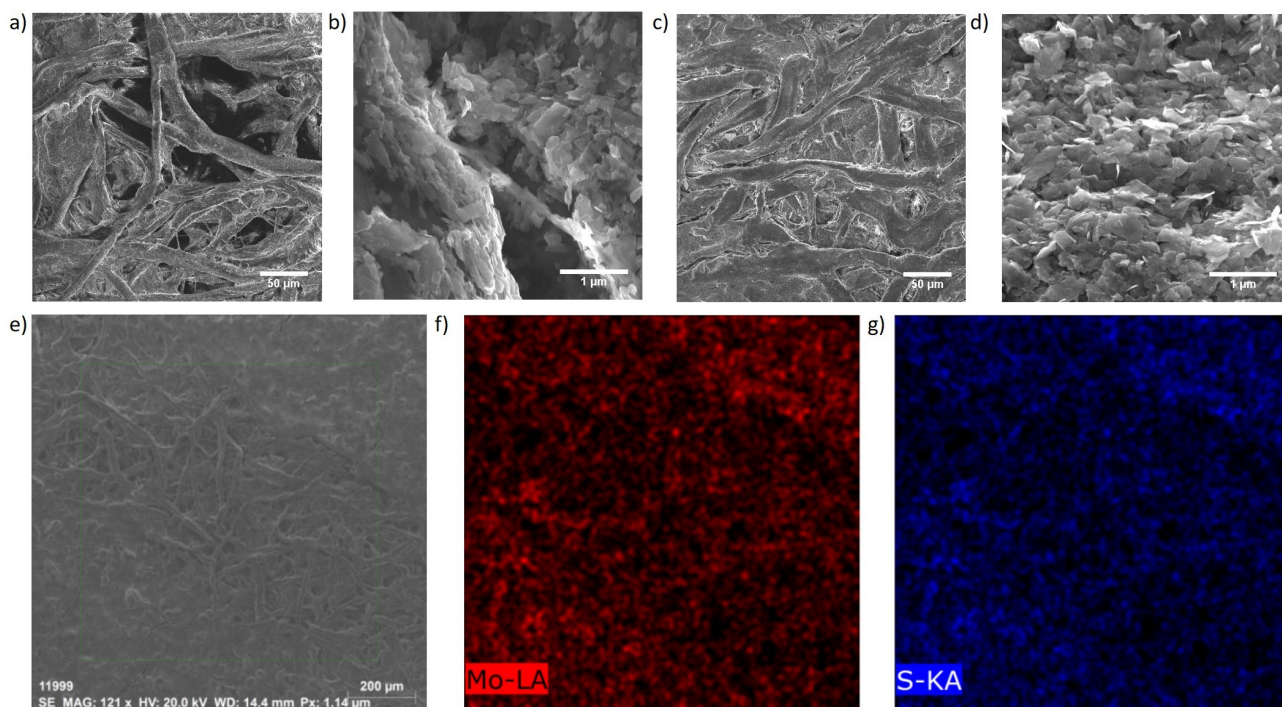

Figure S4. FESEM image of MoS<sub>2</sub> coated cellulose paper (a and b) before, and (c and d) after calendaring, with (e-g) corresponding elemental maps.

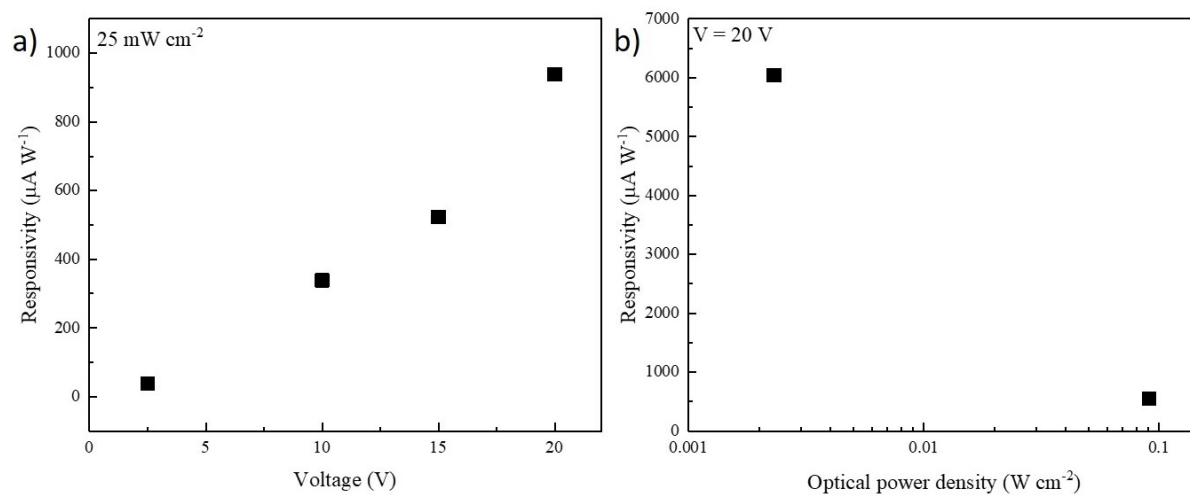

Figure S5. Responsivity as a function of bias voltage and incident optical power.

| S. No. | Description                                                                    | Contact material                  | Responsivity (mA W <sup>-1</sup> ) | Ref.             |
|--------|--------------------------------------------------------------------------------|-----------------------------------|------------------------------------|------------------|
| 1      | MoS <sub>2</sub> (1T and 2H mixture) : MoO <sub>3</sub> photodetectable paper  | Inkjet printed PEDOT:PSS          | 0.134                              | 1                |
| 2      | Solution-processed MoS <sub>2</sub> on glass substrates                        | Au top contact/ITO back contact   | 0.1                                | 2                |
| 3      | Inkjet-printed MoS <sub>2</sub> on Si:SiO <sub>2</sub>                         | Ag                                | 0.036                              | 3                |
| 4      | Liquid exfoliated MoS <sub>2</sub> :WSe <sub>2</sub>                           | Pencil graphite                   | 124                                | 4                |
| 6      | Hydrothermally grown MoS <sub>2</sub> on cellulose paper + carbon quantum dots | Ag paste                          | 18.12                              | 5                |
| 7      | Hydrothermally grown MoS <sub>2</sub> on cellulose paper                       | Screen coated silver interdigital | 290                                | 6                |
| 8      | Liquid exfoliated WSe <sub>2</sub> on paper                                    | Ag paste                          | 17.78                              | 7                |
| 9      | Inkjet-printed MoS <sub>2</sub> on paper                                       | Inkjet-printed graphene           | 0.0005                             | 8                |
| 10     | Rubbing bulk MoS <sub>2</sub> crystals onto paper                              | Pencil graphite                   | 0.0016                             | 9                |
| 13     | Inkjet printed WS <sub>2</sub>                                                 | Screen + Inkjet-printed graphene  | 0.61                               | 10               |
| 14     | Liquid exfoliated WSe <sub>2</sub> - + polyaniline                             | Ag paste                          | 17.26                              | 11               |
| 15     | Inkjet printed MoS <sub>2</sub>                                                | Inkjet printed graphene           | >1                                 | 12               |
| 16     | Spray coated MoS <sub>2</sub> on cellulose paper                               | <b>Screen-printed carbon ink</b>  | 6                                  | <b>This Work</b> |

Table S1. Literature comparison of a few 2D material based photodetectors on paper.

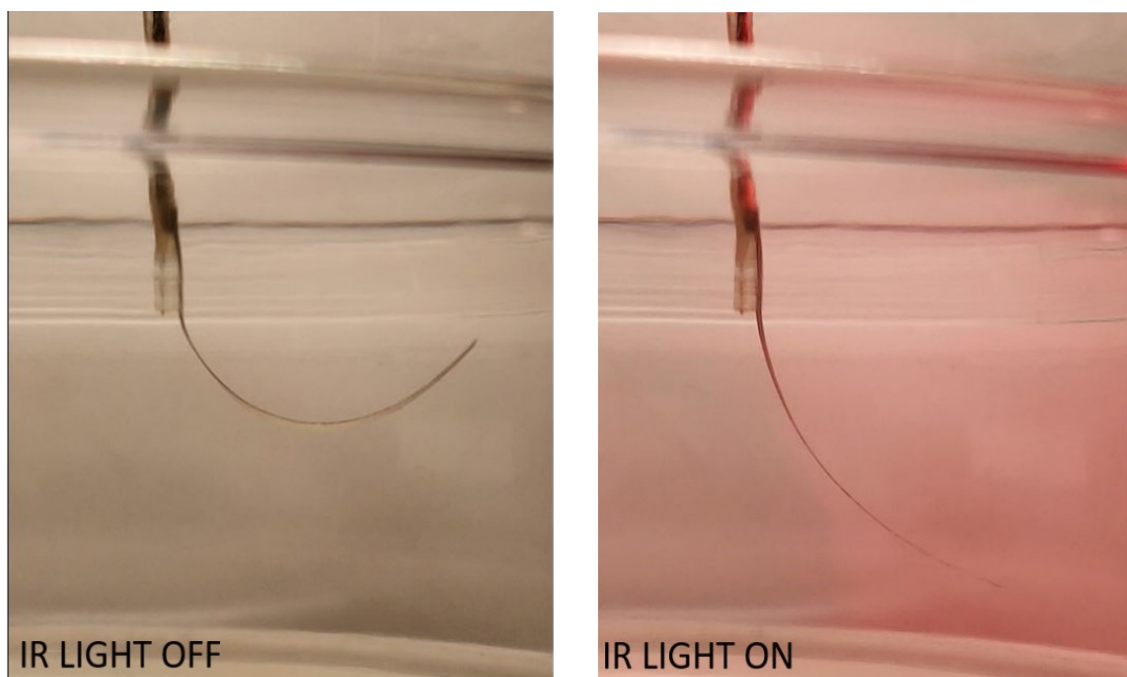

Figure S6. Actuation under vacuum.

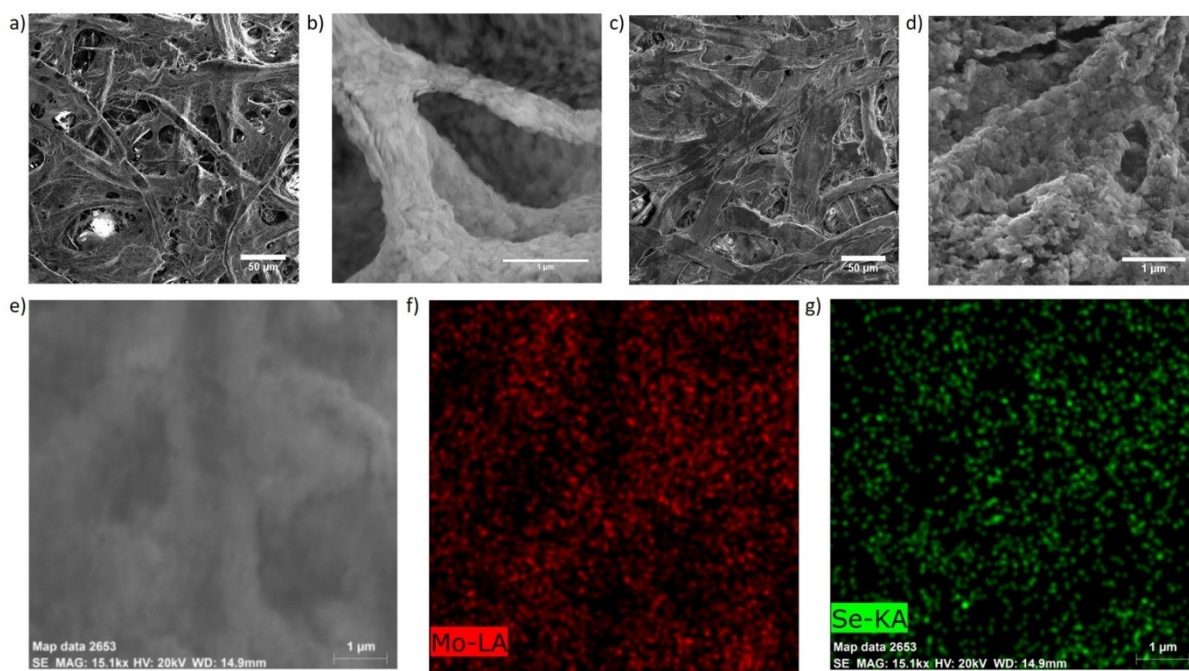

Figure S7. FESEM image of  $\text{MoSe}_2$  coated cellulose paper (a and b) before, and after (c and d) calendaring, with (e-g) corresponding elemental maps.

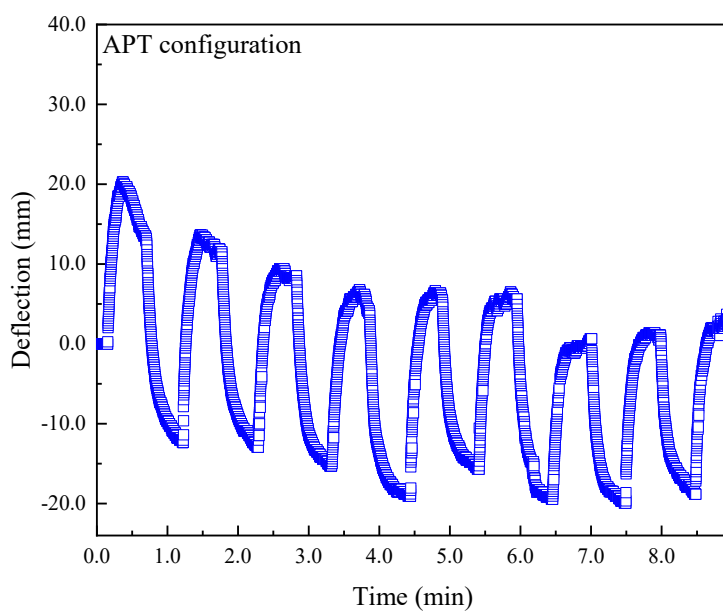

Figure S8. Cyclical stabilization of photothermal actuators after calendaring.

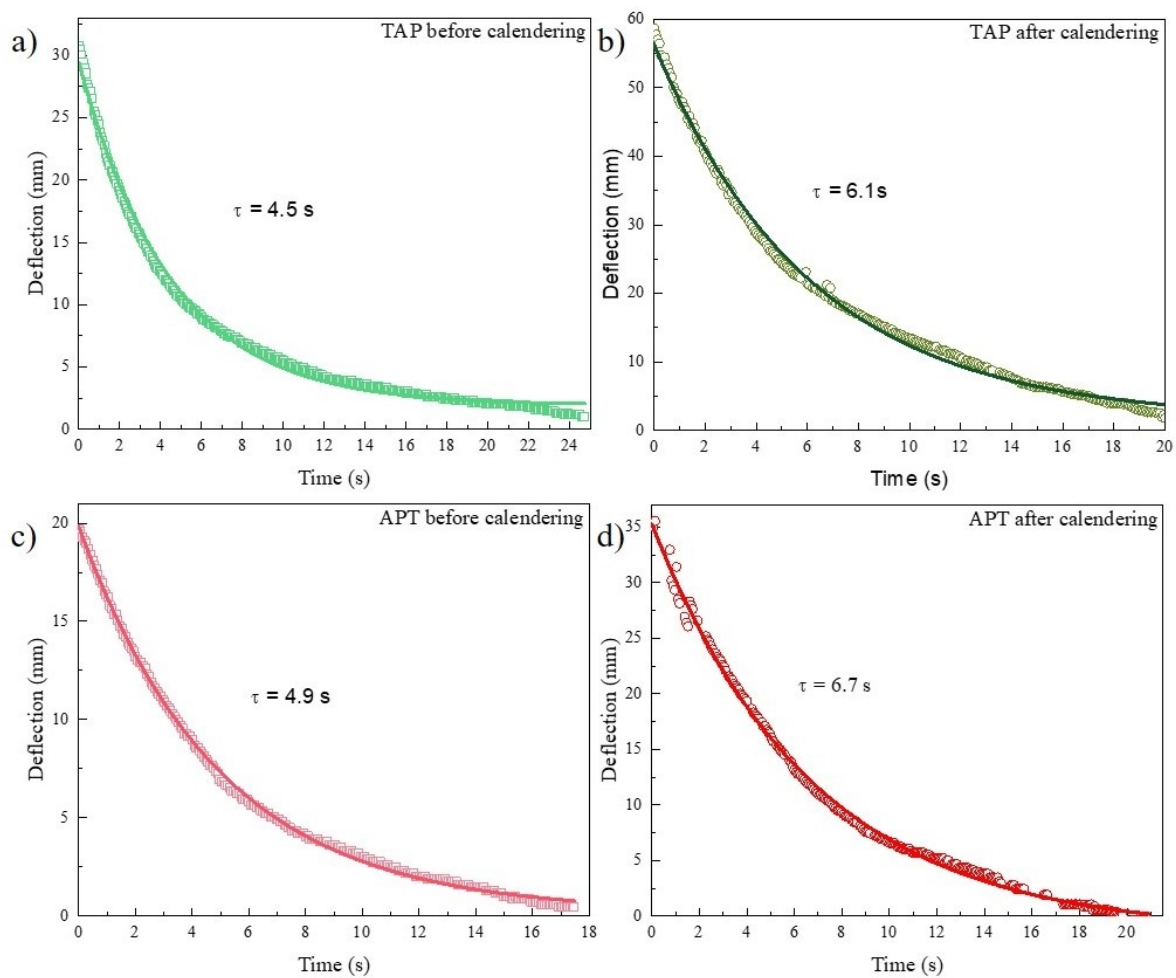

Figure S9. Relaxation profiles of actuators (Error:  $\pm 0.07\text{s}$ ).

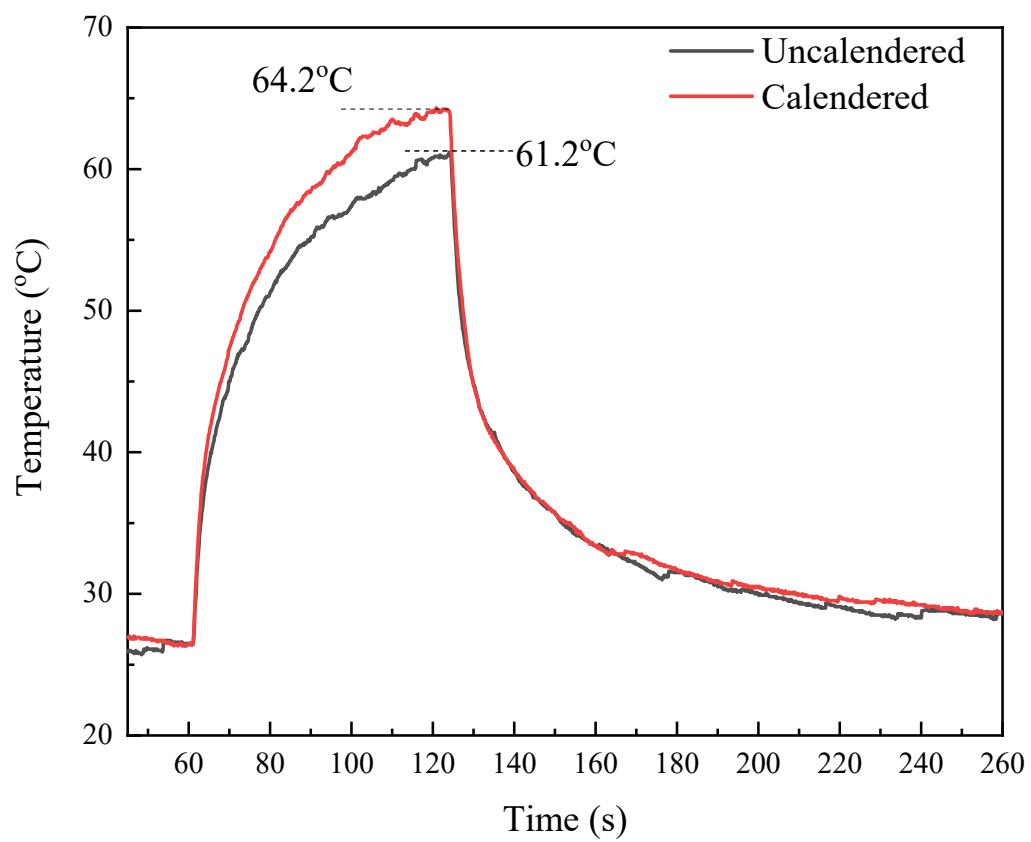

Figure S10. Temperature profiles in transmission mode, before and after calendering.

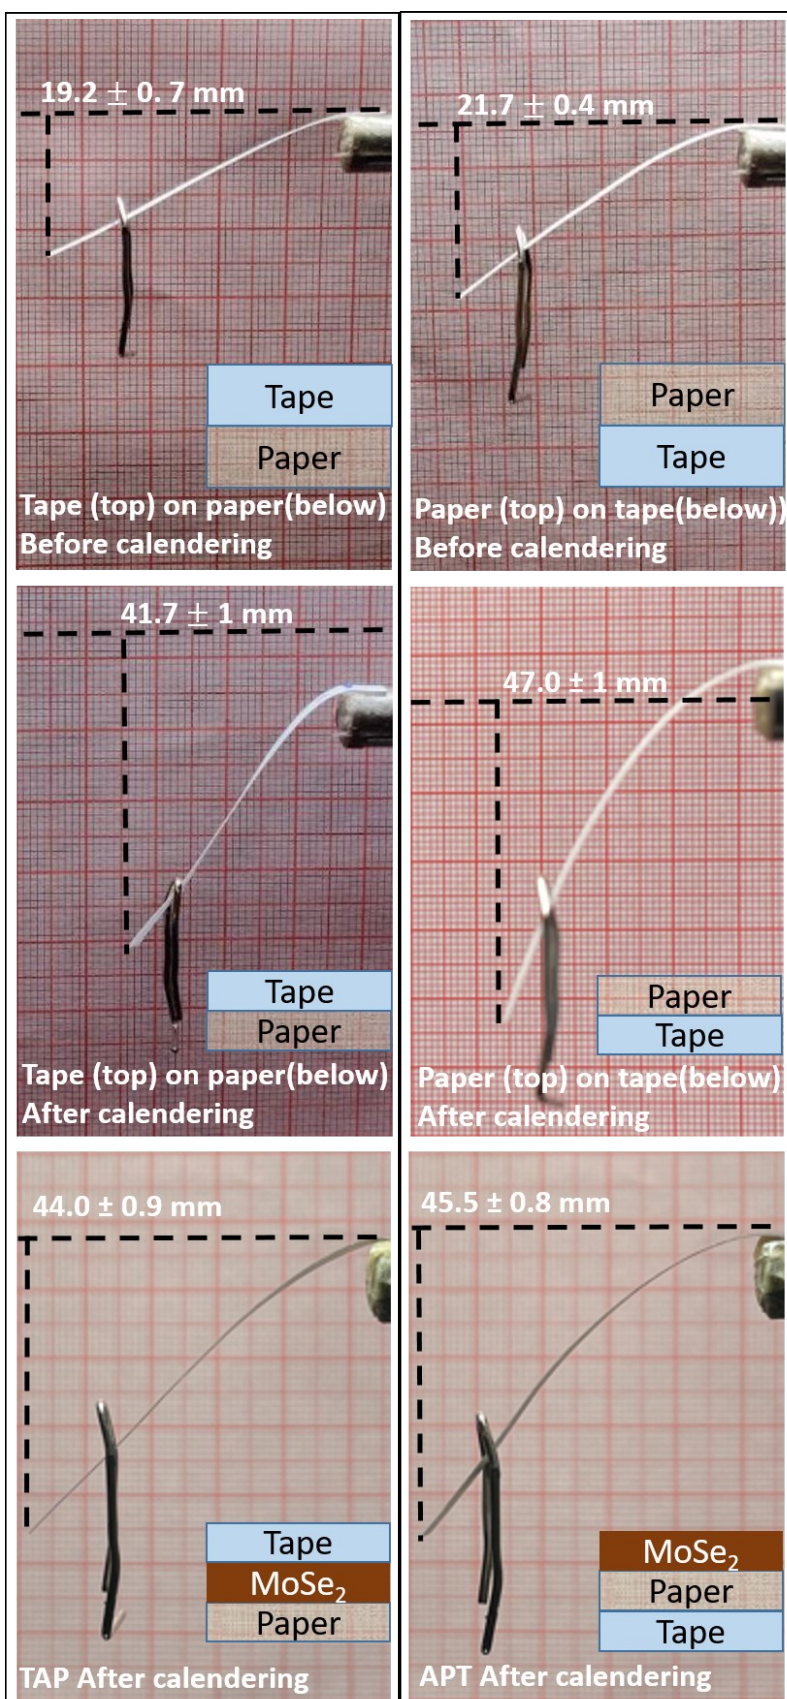

Figure S11. Deflection in cantilever tip of paper-tape bilayers before and after calendaring.



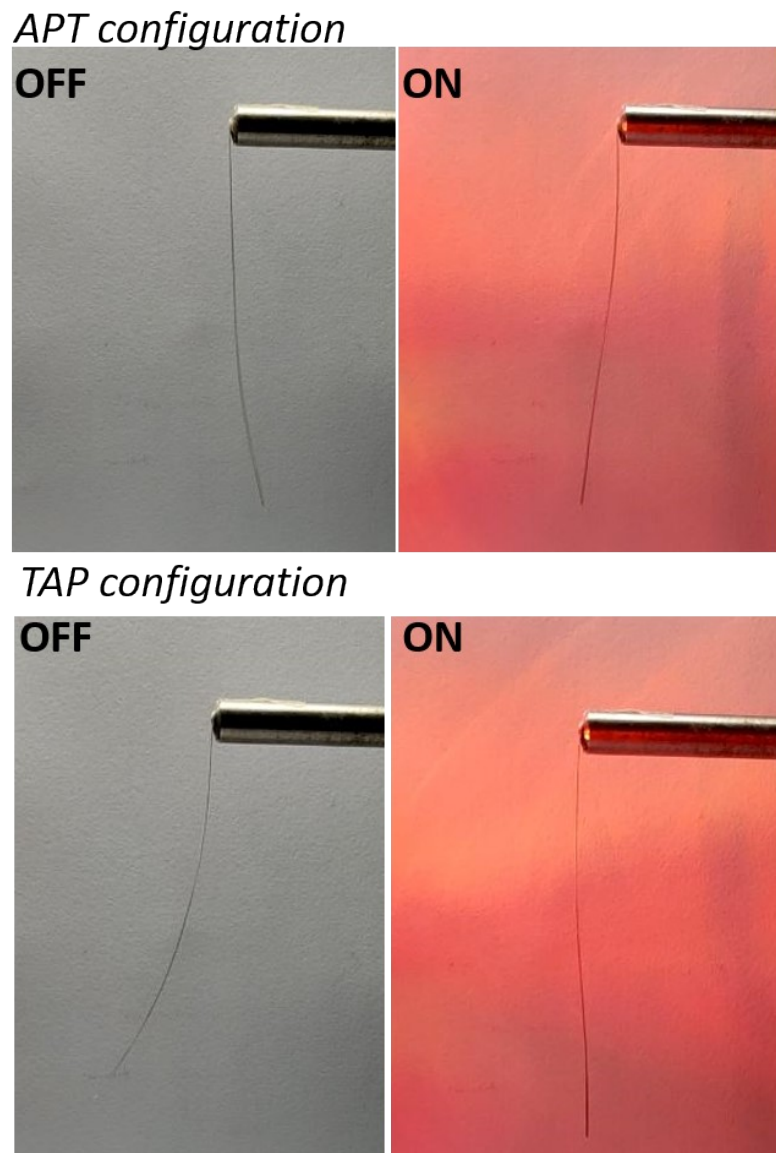

Figure S12. Photothermal actuation with poor interface between tape and paper.

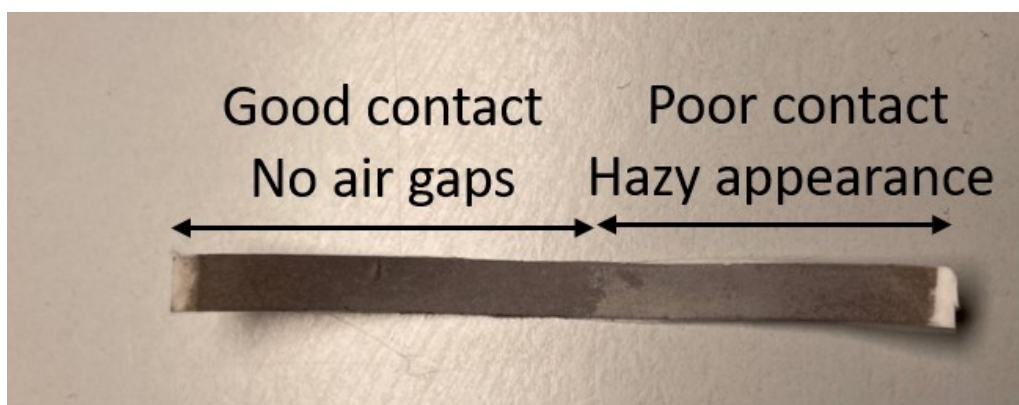

Figure S13. Photograph of a TAP actuator showing the interface between the tape and MoSe<sub>2</sub> coated paper.

## References

1. Y. Wei, V.-T. Tran, C. Zhao, H. Liu, J. Kong and H. Du, *ACS Appl. Mater. Interface.*, 2019, **11**, 21445-21453.
2. G. Cunningham, U. Khan, C. Backes, D. Hanlon, D. McCloskey, J. F. Donegan and J. N. Coleman, *J. Mater. Chem. C*, 2013, **1**, 6899-6904.
3. J. Li, M. M. Naiini, S. Vaziri, M. C. Lemme and M. Östling, *Adv. Funct. Mater.*, 2014, **24**, 6524-6531.
4. P. M. Pataniya, V. Patel and C. Sumesh, *Nanotechnol.*, 2021, **32**, 315709.
5. P. Sahatiya, S. S. Jones and S. Badhulika, *Appl. Mater. Today*, 2018, **10**, 106-114.
6. N. J. Cordeiro, C. Gaspar, M. J. d. Oliveira, D. Nunes, P. Barquinha, L. Pereira, E. Fortunato, R. Martins, E. Laureto and S. A. Lourenço, *Appl. Sci.*, 2021, **11**, 1234.
7. P. Pataniya, C. K. Zankat, M. Tannarana, C. Sumesh, S. Narayan, G. Solanki, K. Patel, V. Pathak and P. K. Jha, *ACS Appl. Nano Mater.*, 2019, **2**, 2758-2766.
8. D. McManus, A. Dal Santo, P. Selvasundaram, R. Krupke, A. LiBassi and C. Casiraghi, *Flex. Print. Electron.*, 2018, **3**, 034005.
9. A. Mazaheri, M. Lee, H. S. Van Der Zant, R. Frisenda and A. Castellanos-Gomez, *Nanoscale*, 2020, **12**, 19068-19074.
10. T. Leng, K. Parvez, K. Pan, J. Ali, D. McManus, K. S. Novoselov, C. Casiraghi and Z. Hu, *2D Mater.*, 2020, **7**, 024004.
11. D. Kannichankandy, P. M. Pataniya, C. K. Zankat, M. Tannarana, V. M. Pathak, G. K. Solanki and K. D. Patel, *Appl. Surf. Sci.*, 2020, **524**, 146589.
12. D. McManus, S. Vranic, F. Withers, V. Sanchez-Romaguera, M. Macucci, H. Yang, R. Sorrentino, K. Parvez, S.-K. Son, G. Iannaccone, K. Kostarelos, G. Fiori and C. Casiraghi, *Nat. Nanotechnol.*, 2017, **12**, 343-350.
